# Supplementary material
Source: publisher site journal article supplement (https://www.dovepress.com/get_supplementary_file.php?f=378003.docx)
Supplement: Supplementary file 1 [file get_supplementary_file.php]

**Supplementary materials**

**Copenhagen Criteria**

Diagnostic criteria for ulcerative colitis are based upon the presence of at least three of four criteria:

(a) Typical case history with diarrhea or blood and pus, or both, in the stools for more than 1 wk. or at repeated episodes.

(b) A typical sigmoidoscopic picture with granulated, friable mucosa or ulcerations, or both, of the surface mucosa.

(c) Histologic or cytologic signs, or both, of inflammation.

(d) Radiologic or colonoscopic signs, or both, of ulcerations with or without spiculated, granulated inner surface of the colon proximal to the rectum.

For both ulcerative colitis and Crohn's disease, infectious diseases and neoplastic diseases have to be ruled out beforehand. The diagnosis of Crohn's disease is based upon the presence of at least two of four diagnostic criteria:

(a) Case history of diarrhea for more than 3 mo.

(b) Radiologic findings with typical stenoses and prestenotic dilatations in the small bowel or segmental findings with copplestone relief in the large bowel.

(c) Histologic findings according to Morson (1) with transmural lymphocytic infiltration or occurrence of epithelial granulomas with giant cells of Langhans' type, or both.

(d) Occurrence of fistulas or abscesses, or both, in relation to intestinal lesion.
